# Supplementary material
Source: PubMed Central journal article supplement (PMC5928865)
Supplement: jciinsight-3-120157-s001.pdf [file jciinsight-3-120157-s001.pdf]

**Supplemental Data**

**Macrophage microRNA-150 promotes pathological angiogenesis as seen in age-related macular degeneration**

Jonathan B. Lin, Harsh V. Moolani, Abdoulaye Sene, Rohini Sidhu, Pamela Kell, Joseph B. Lin, Zhenyu Dong, Norimitsu Ban, Daniel S. Ory, & Rajendra S. Apte\*

\* Corresponding Author

**Supplemental Table S1.** List of putative microRNA-150 targets.

| <b>Gene symbol</b>   | <b>Fold change<br/>(aged versus young)</b> | <b>Fold change<br/>(miR-150<sup>OE</sup> versus NC)</b> |
|----------------------|--------------------------------------------|---------------------------------------------------------|
| <i>3110070M22Rik</i> | -1.39                                      | -1.86                                                   |
| <i>Aldoc</i>         | -1.85                                      | -1.30                                                   |
| <i>Atp1a3</i>        | -1.46                                      | -1.25                                                   |
| <i>Ak8</i>           | -1.42                                      | -1.25                                                   |
| <i>Cbx8</i>          | -1.28                                      | -1.46                                                   |
| <i>Cd33</i>          | -1.48                                      | -1.23                                                   |
| <i>Agap1</i>         | -1.33                                      | -1.30                                                   |
| <i>Sl00a8</i>        | -1.21                                      | -1.49                                                   |
| <i>Slc29a1</i>       | -1.30                                      | -1.29                                                   |
| <i>Fasn</i>          | -1.55                                      | -1.20                                                   |
| <i>Ptgir</i>         | -1.82                                      | -1.21                                                   |
| <i>Gsn</i>           | -1.26                                      | -1.24                                                   |
| <i>Pygl</i>          | -1.21                                      | -1.21                                                   |
| <i>Insig1</i>        | -1.62                                      | -1.26                                                   |
| <i>Itgax</i>         | -1.84                                      | -1.26                                                   |
| <i>Cers4</i>         | -1.24                                      | -1.30                                                   |
| <i>Ldhb</i>          | -1.25                                      | -1.28                                                   |
| <i>Lpin1</i>         | -1.31                                      | -1.21                                                   |
| <i>Mvd</i>           | -1.77                                      | -1.36                                                   |
| <i>Padi2</i>         | -1.45                                      | -1.34                                                   |
| <i>Pik3r2</i>        | -1.20                                      | -1.22                                                   |
| <i>Pnkd</i>          | -1.51                                      | -1.29                                                   |
| <i>Ptprs</i>         | -1.34                                      | -1.45                                                   |
| <i>Plxnd1</i>        | -1.43                                      | -1.21                                                   |
| <i>Ptgir</i>         | -1.82                                      | -1.21                                                   |
| <i>Slc2a6</i>        | -1.51                                      | -1.31                                                   |
| <i>Scarb1</i>        | -1.35                                      | -1.22                                                   |
| <i>Stac2</i>         | -1.34                                      | -1.28                                                   |
| <i>Scd2</i>          | -3.65                                      | -1.30                                                   |
| <i>Sort1</i>         | -1.56                                      | -1.24                                                   |
| <i>Tkt</i>           | -1.25                                      | -1.24                                                   |
| <i>Trim36</i>        | -1.61                                      | -1.23                                                   |
| <i>F3</i>            | -1.39                                      | -1.30                                                   |
| <i>Vsig8</i>         | -1.91                                      | -1.29                                                   |
| <i>Wfs1</i>          | -1.36                                      | -1.34                                                   |
| <i>Vwf</i>           | -1.32                                      | -1.54                                                   |

**Supplemental Table S2.** List of primers used for real-time PCR.

| <b>Gene target</b> | <b>Product number</b> |
|--------------------|-----------------------|
| U6                 | 203907                |
| miR-150-5p         | 204660                |
| <i>Actb</i>        | Mm00607939_s1         |
| <i>Gapdh</i>       | Mm99999915_g1         |
| <i>Agap1</i>       | Mm00626367_m1         |
| <i>Aldoc</i>       | Mm01298116_g1         |
| <i>Atp1a3</i>      | Mm00523430_m1         |
| <i>Cbx8</i>        | Mm00489229_m1         |
| <i>Cd33</i>        | Mm00491152_m1         |
| <i>Cers4</i>       | Mm00482658_m1         |
| <i>F3</i>          | Mm00438855_m1         |
| <i>Fasn</i>        | Mm00662319_m1         |
| <i>Insig1</i>      | Mm00463389_m1         |
| <i>Lpin1</i>       | Mm00550511_m1         |
| <i>Padi2</i>       | Mm01341648_m1         |
| <i>Pik3r2</i>      | Mm00435694_m1         |
| <i>Plxnd1</i>      | Mm01184367_m1         |
| <i>Pnkd</i>        | Mm00480252_m1         |
| <i>Ptgir</i>       | Mm00801939_m1         |
| <i>Ptprs</i>       | Mm00465150_m1         |
| <i>Scarb1</i>      | Mm00450234_m1         |
| <i>Scd2</i>        | Mm01208542_m1         |
| <i>Slc2a6</i>      | Mm00554217_m1         |
| <i>Sort1</i>       | Mm00490905_m1         |
| <i>Stac2</i>       | Mm00524631_m1         |
| <i>Tkt</i>         | Mm00447559_m1         |
| <i>Trim36</i>      | Mm00619032_m1         |
| <i>Vsig8</i>       | Mm00624907_m1         |
| <i>Vwf</i>         | Mm00550376_m1         |
| <i>Wfs1</i>        | Mm00495979_m1         |

**Supplemental Table S3.** List of primers used in custom PCR array plates.

| <b>Gene target</b> | <b>TaqMan® expression assay</b> |
|--------------------|---------------------------------|
| <i>18S</i>         | Hs99999901_s1                   |
| <i>Actb</i>        | Mm00607939_s1                   |
| <i>Ccl2</i>        | Mm00441242_m1                   |
| <i>Fas</i>         | Mm00433237_m1                   |
| <i>Fgf2</i>        | Mm01285715_m1                   |
| <i>Gapdh</i>       | Mm99999915_g1                   |
| <i>Hprt</i>        | Mm00446968_m1                   |
| <i>Icam1</i>       | Mm00516023_m1                   |
| <i>Il1b</i>        | Mm01336189_m1                   |
| <i>Mmp9</i>        | Mm00442991_m1                   |
| <i>Ptgs2</i>       | Mm00478374_m1                   |
| <i>Socs1</i>       | Mm00782550_s1                   |
| <i>Tnf</i>         | Mm00443258_m1                   |
| <i>Vcam1</i>       | Mm00449197_m1                   |
| <i>Vegfa</i>       | Mm00437304_m1                   |
